# Supplementary material for: A low temperature operating gas sensor with high response to NO2 based on ordered mesoporous Ni-doped In2O3
Source: Royal Society of Chemistry journal article supplement (doi:10.1039/c5nj02325d), 2016-01-01
Supplement: c5nj02325d1.pdf [file c5nj02325d1.pdf]

## New Journal of Chemistry

Title: Low temperature operating gas sensor with high response to NO<sub>2</sub> based on ordered mesoporous Ni-doped In<sub>2</sub>O<sub>3</sub>

QiuyueYang,<sup>a</sup> XiaobiaoCui,<sup>a</sup> JiangyangLiu,<sup>a</sup> Jing Zhao,<sup>b</sup> YinglinWang<sup>a</sup> Yuan Gao,<sup>\*a</sup> Pengsun,<sup>a</sup> Jian Ma,<sup>\*a</sup> GeyuLu<sup>a</sup>

a. State Key Laboratory on Integrated Optoelectronics, College of Electronic Science and Engineering, Jilin University, 2699 Qianjin Street, Changchun 130012, China.

b. College of Electrical and Electronic Engineering, Changchun University of Technology, Changchun 130012, China

## Supporting Information

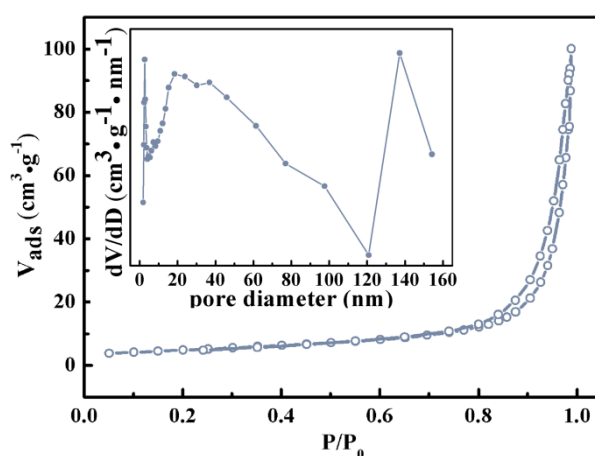

Figure S1. Nitrogen adsorption-desorption isotherms and corresponding pore size distribution(inset) of Ni-doped In<sub>2</sub>O<sub>3</sub> without SBA-15

The Ni-doped In<sub>2</sub>O<sub>3</sub> without SBA-15 had been synthesized in the same condition with ordered mesoporous Ni-doped In<sub>2</sub>O<sub>3</sub> mentioned in the paper. The nitrogen adsorption-desorption isotherms and the corresponding pore size distribution of the Ni-doped In<sub>2</sub>O<sub>3</sub> prepared without the template SBA-15 were shown in Fig.S1. The pore size distribution of Ni-doped In<sub>2</sub>O<sub>3</sub> without SBA-15 was not single as that of mesoporous ordered In<sub>2</sub>O<sub>3</sub>. The surface area of Ni-doped In<sub>2</sub>O<sub>3</sub> without SBA-15 is 17.1 m<sup>2</sup>/g, which is much smaller than that of mesoporous Ni-doped In<sub>2</sub>O<sub>3</sub> (58.5 m<sup>2</sup>/g) and mesoporous In<sub>2</sub>O<sub>3</sub> (50.3 m<sup>2</sup>/g). It meant the materials synthesized by nanocasting method with SBA-15 as template had higher surface area.

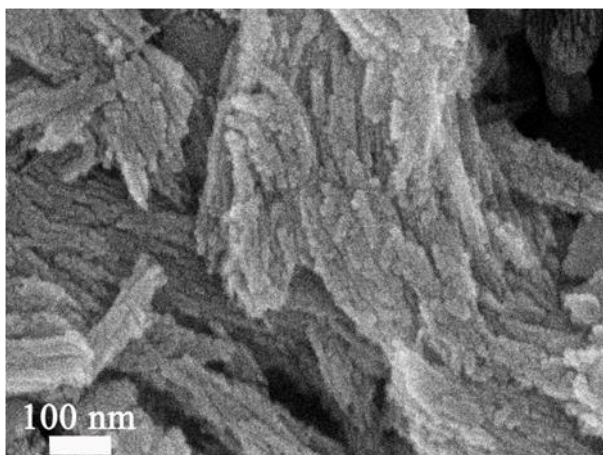

Figure S2. The SEM image of mesoporous Ni-doped In<sub>2</sub>O<sub>3</sub>

The morphology of mesoporous Ni-doped  $\text{In}_2\text{O}_3$  was characterized by SEM. It could be seen that mesoporous Ni-doped  $\text{In}_2\text{O}_3$  consisted of fiber-like aggregates, which was similar to the typical morphology of SBA-15.
